# Supplementary figures and images for: Dynamics of Cryptococcus neoformans-Macrophage Interactions Reveal that Fungal Background Influences Outcome during Cryptococcal Meningoencephalitis in Humans
Source: PubMed Central journal article supplement — mBio. 2011 Aug 9;2(4):e00158-11. doi: 10.1128/mBio.00158-11 (PMC3149853; doi:10.1128/mbio.00158-11), 2011-08-09

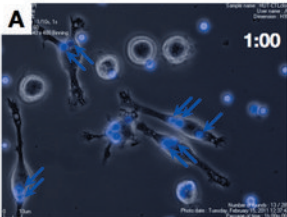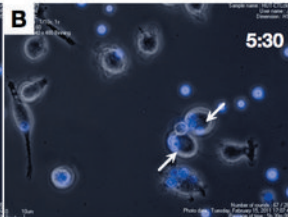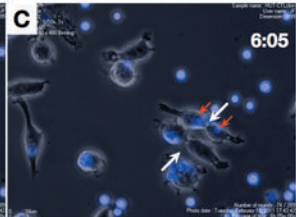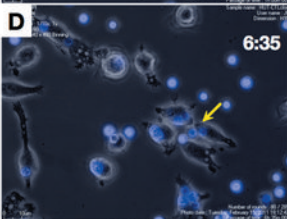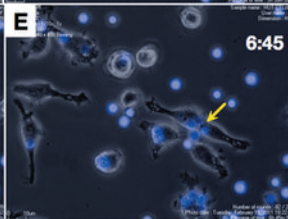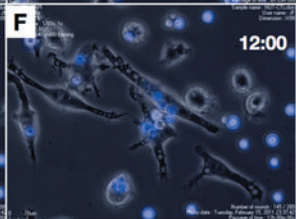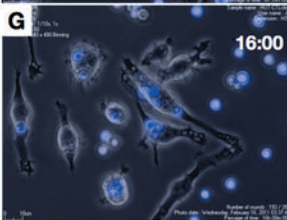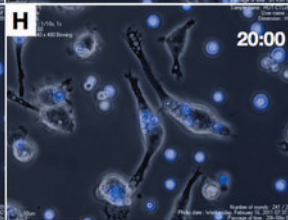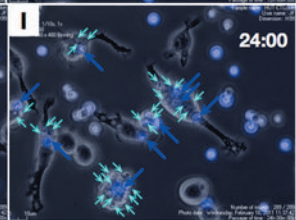

Supplement: mbo004111147sf01.pdf [file mbo004111147sf01.pdf]

**A**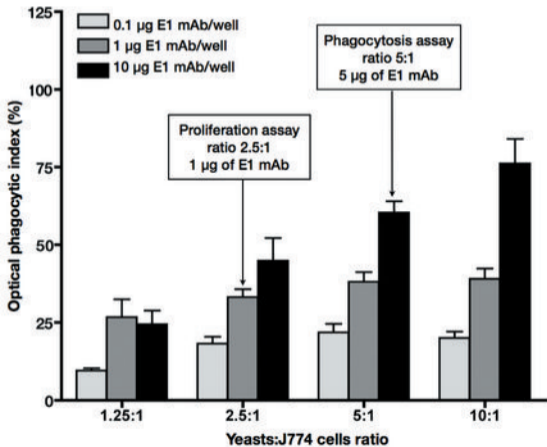**B**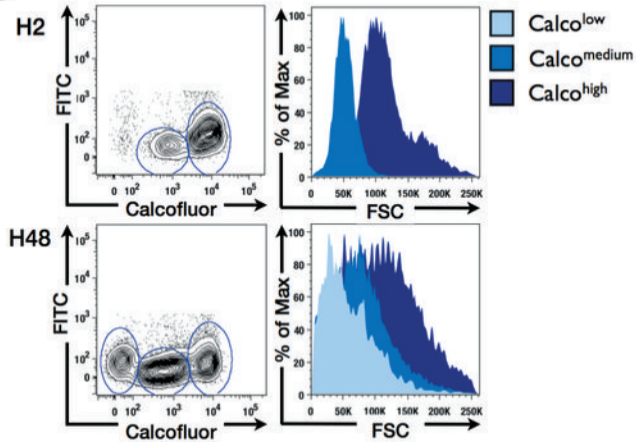

Supplement: mbo004111147sf02.pdf [file mbo004111147sf02.pdf]

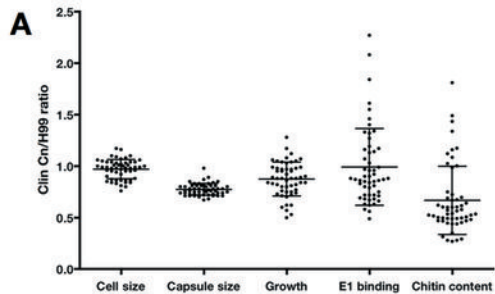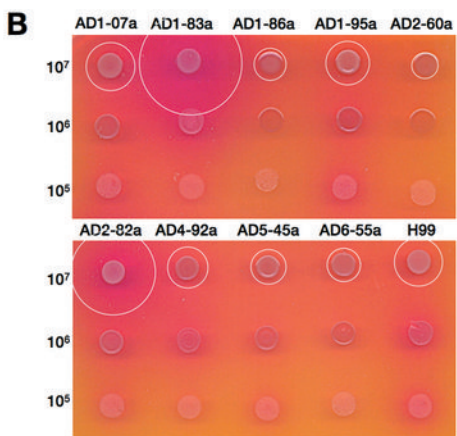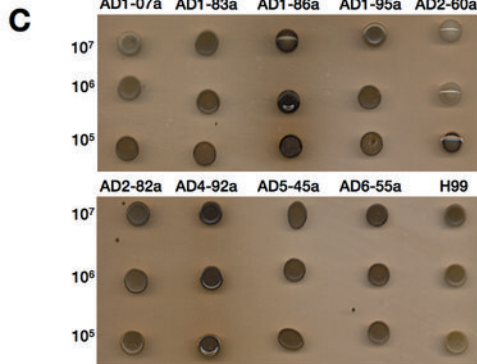

Supplement: mbo004111147sf03.pdf [file mbo004111147sf03.pdf]

H99

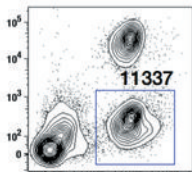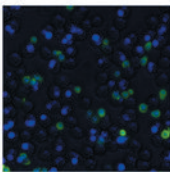

AD1-83a

PI=1.81

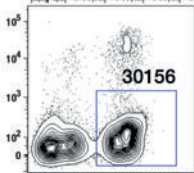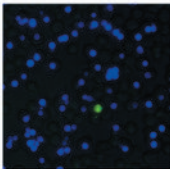

AD2-60a

PI= 0.06

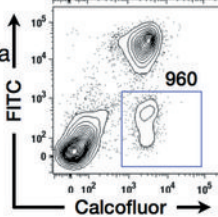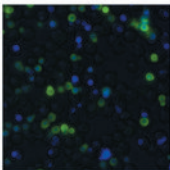

Supplement: mbo004111147sf04.pdf [file mbo004111147sf04.pdf]

H2

H24

H48

H99

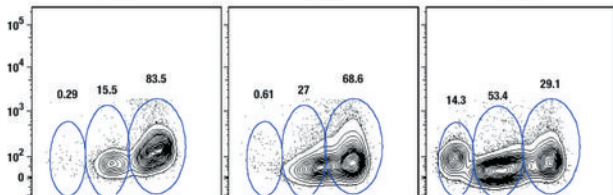

AD1-07a

IPH2=3.00  
IPH48=1.74

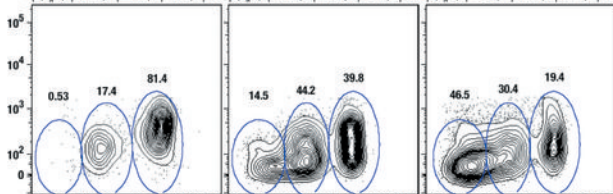

AD2-82a

IPH2=1.11  
IPH48=0.34

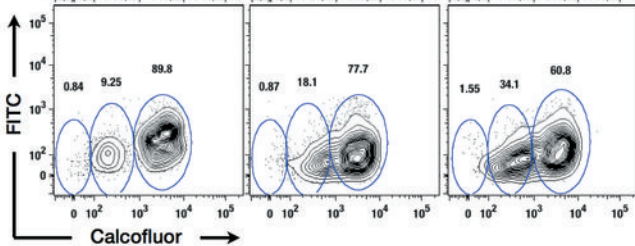

Supplement: mbo004111147sf05.pdf [file mbo004111147sf05.pdf]

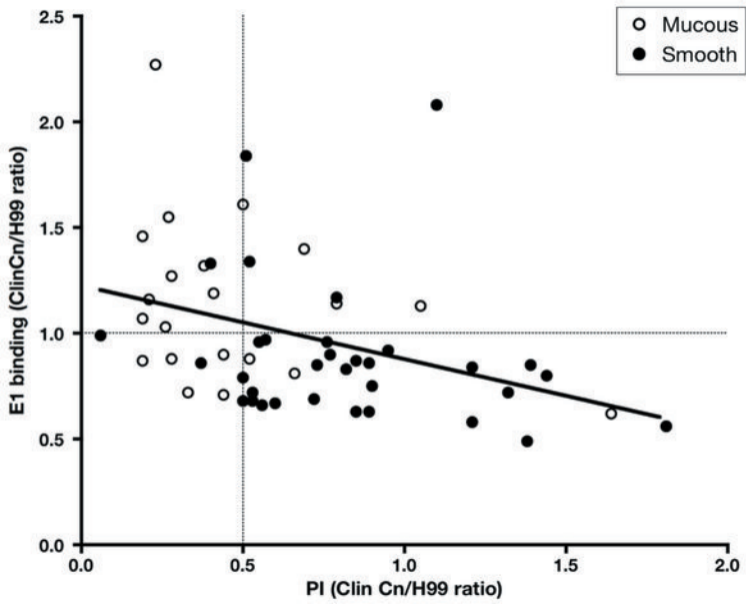

Supplement: mbo004111147sf06.pdf [file mbo004111147sf06.pdf]

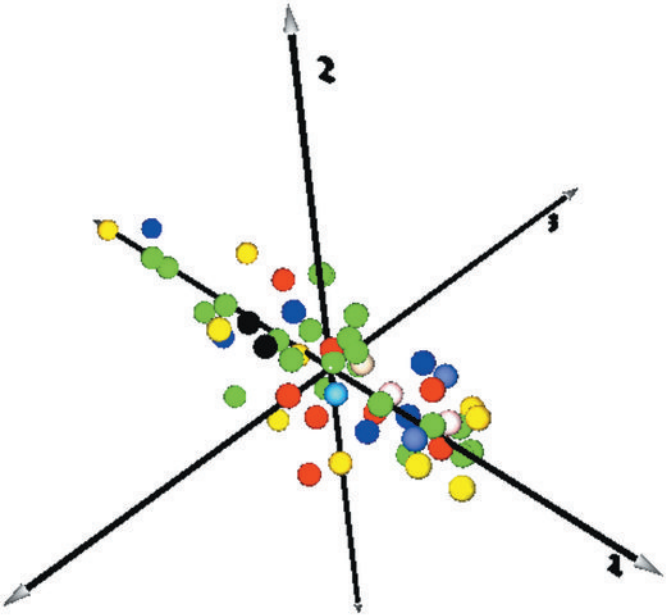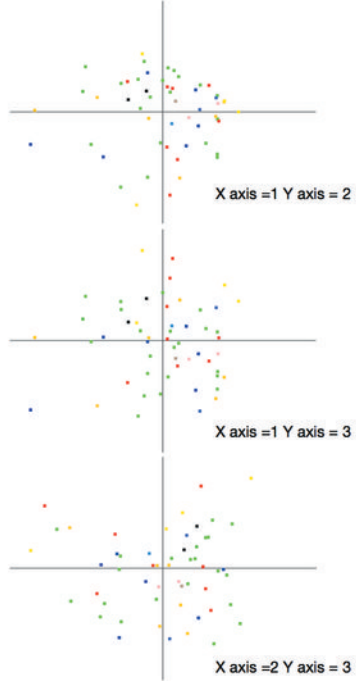

Supplement: mbo004111147sf07.pdf [file mbo004111147sf07.pdf]
